# Supplementary material
Source: PubMed Central journal article supplement (PMC3294475)
Supplement: supp_78.5.1596_AEM-AEM06511-11-s01.pdf [file supp_78.5.1596_AEM-AEM06511-11-s01.pdf]

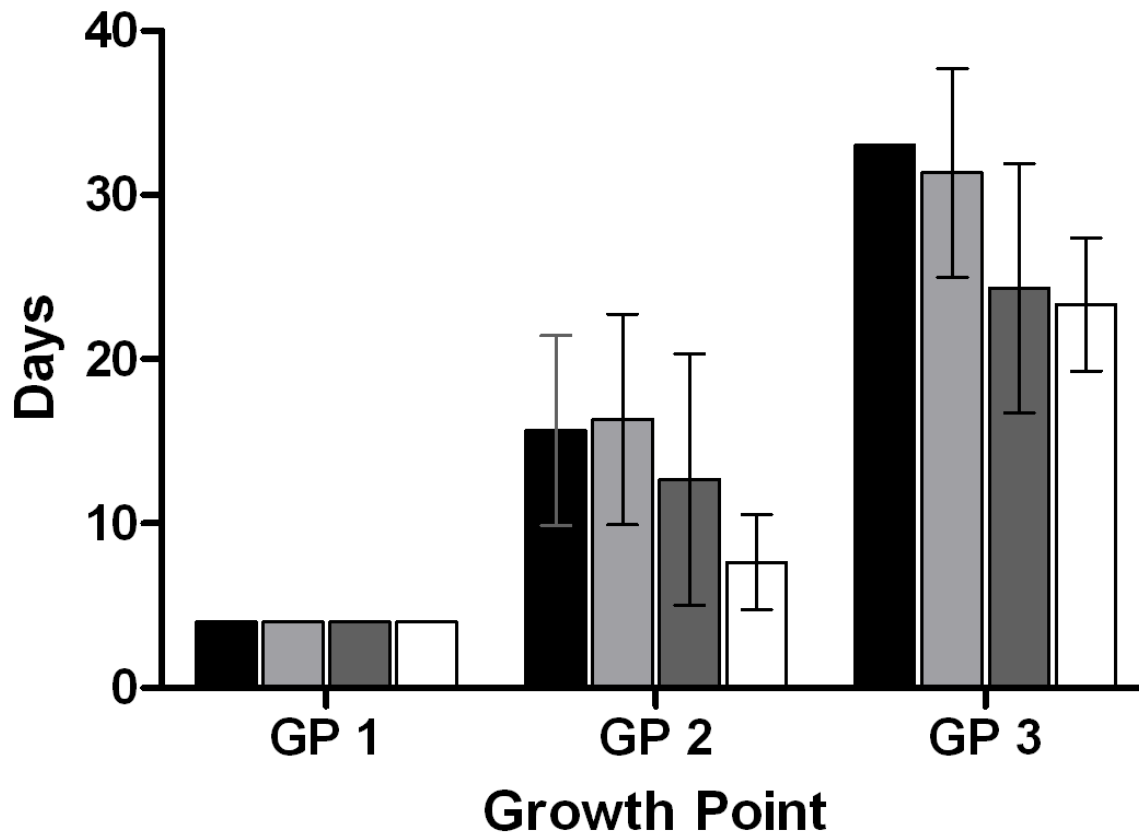

Supplemental Figure 1. Harvest times for *P. carnosa* cultivations grown on fir (black), pine (light grey), spruce (dark grey), and maple (white). Error bars represent standard deviation, n=3. Reported in part in Mahajan, S., D. Jeremic, R.E. Goacher, and E.R. Master. 2011. Mode of coniferous wood decay by the white rot fungus *Phanerochaete carnosa* as elucidated by FTIR and ToF-SIMS. Appl. Microbiol. Biotech. DOI: 10.1007/s00253-011-3830-1.
