# Supplementary material
Source: PubMed Central journal article supplement (PMC3294475)
Supplement: supp_78.5.1596_AEM-AEM06511-11-s02.pdf [file supp_78.5.1596_AEM-AEM06511-11-s02.pdf]

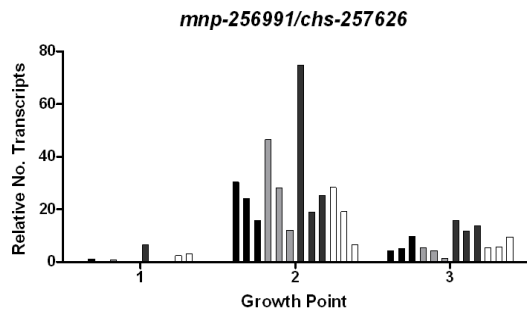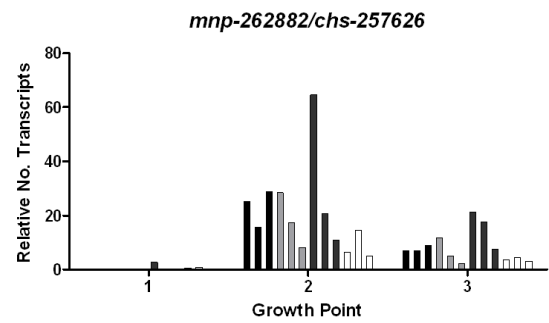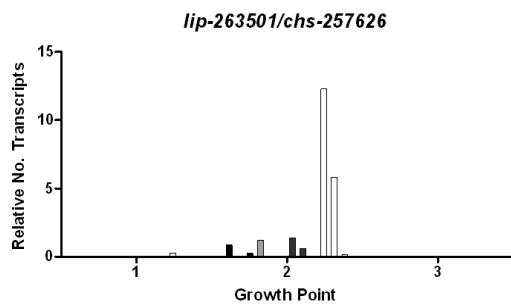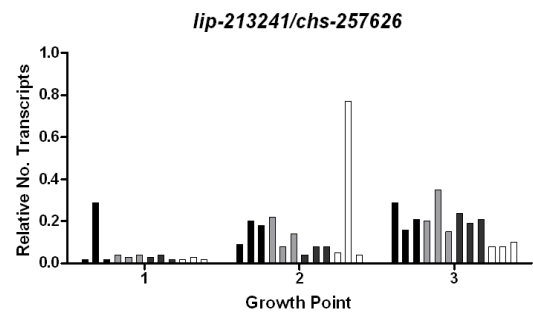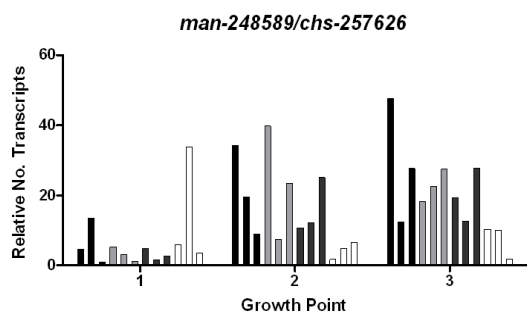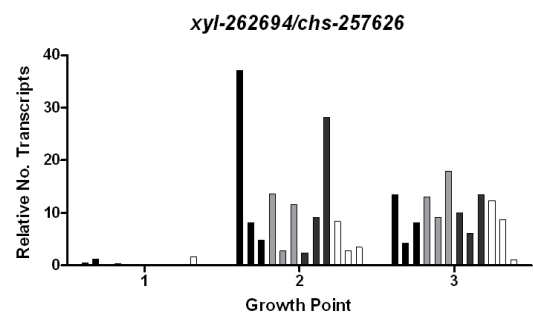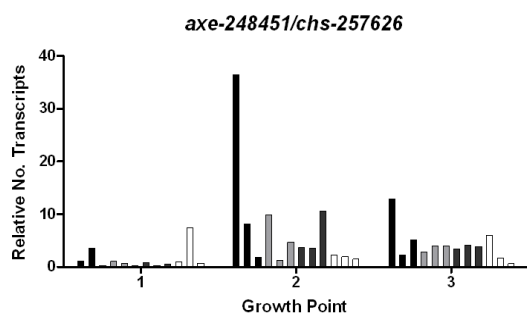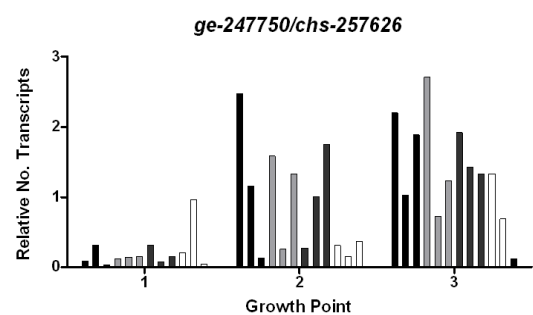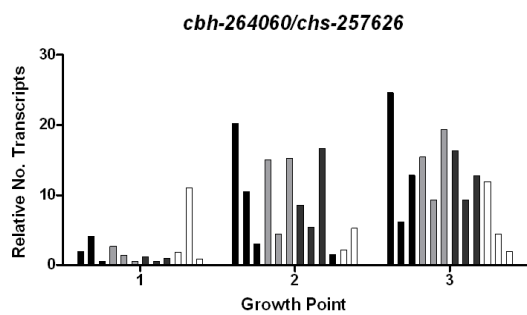

Supplemental Figure 2. Time-dependent abundance of transcript sequences in triplicate cultivations of *P. carnosus* grown on fir (black), pine (light grey), spruce (dark grey), and maple (white). Transcript abundances normalized using *chs* as an internal reference are indicated.
