# Supplementary material
Source: PubMed Central journal article supplement (PMC3294475)
Supplement: supp_78.5.1596_AEM-AEM06511-11-s03.pdf [file supp_78.5.1596_AEM-AEM06511-11-s03.pdf]

Supplemental Table 1. Primers for RT-qPCR.

| Protein ID <sup>a</sup> | Predicted activity    | left primer 5'→3'     | right primer 5'→3'   |
|-------------------------|-----------------------|-----------------------|----------------------|
| 248451                  | acetyl xylan esterase | GGGCCAGCTCATTCTCACT   | GGTCGTCCACTGCTTGATCT |
| 249164                  | actin                 | TCAATGCACCAGCGTTCTAC  | CGAGGTCGATACGGAGGATA |
| 264060                  | cellobiohydrolase     | GAATCGACGCCGTCAACTCG  | CGAGGACCATACCGGTGTTG |
| 257626                  | chitin synthase       | TTATCAAGCCGGAAATCGTC  | GAGGTTGTGGATGGTCGAGT |
| 261268                  | GAPDH                 | TCCAAGTACACCGTCATCTCC | GGAAAGCAAGACCAGTCAGC |
| 247750                  | glucuronoyl esterase  | CTTCCGTACGACCACCACTC  | GAAGAGGGTTGGGTTGAGGT |
| 263501                  | lignin peroxidase     | ACATCGGTCTCGACGAAGTC  | TCTGGTCGACAGTGTGGAAC |
| 213241                  | lignin peroxidase     | ATGTCGGCCTTGATGAGATT  | GGACAAGACCATCAGGAGCA |
| 262882                  | manganese peroxidase  | GAACAAGACCATTGCTGCCA  | GAAGGGAGCGGCATCAATG  |
| 256991                  | manganese peroxidase  | GAACCACACTATTCCCGCCG  | GCGAGCAGGGCGATGACT   |
| 248589                  | mannanase             | CATTAGCTCGGGACTCACG   | GGATGATAGGGTACACCGGA |
| 262694                  | xylanase              | CCGACGGAACATTCCTGTG   | CGCGATCTGGGGGTAGGAC  |

<sup>a</sup>Protein IDs from the JGI genome portal (<http://www.jgi.doe.gov/Pcarnosa>).
