# Supplementary material
Source: PubMed Central journal article supplement (PMC3294475)
Supplement: supp_78.5.1596_AEM-AEM06511-11-s04.pdf [file supp_78.5.1596_AEM-AEM06511-11-s04.pdf]

Supplemental Table 2. Primers used to generate plasmid standards.

| Protein ID <sup>a</sup> | Predicted activity    | left primer 5'→3' <sup>b</sup>       | right primer 5'→3'   |
|-------------------------|-----------------------|--------------------------------------|----------------------|
| 248451                  | acetyl xylan esterase | CAGCAACTTCGGTACCAACC                 | AACGTCGAGTTCGAGTAGCC |
| 249164                  | actin                 | GGTTCCGGCATGTGCAAG                   | CCACCGATCCAGACGGAGTA |
| 264060                  | cellobiohydrolase     | ATGAGCAGCGAAACCGAGTAC                | AGAAGACGACCTGTGCGTTC |
| 257626                  | chitin synthase       | ATCTCACACCACATGGCAA                  | CCCCAAGAGAAGTCATCGAA |
| 261268                  | GAPDH                 | CCAAGGACGGCAAGCTCT                   | TTAGAGGGCACCGTCGACCT |
| 247750                  | glucuronoyl esterase  | CATCATCGACGTGCTCGAGGTCA              | (3'RACE)             |
| 263501                  | lignin peroxidase     | (5' RACE)                            | GTCTCGACGAAGAACTG    |
| 213241                  | lignin peroxidase     | (5' RACE)                            | ACGAAGGACTGCCACTC    |
| 262882                  | manganese peroxidase  | GACGGCTCCATGCTCCTGTTCCC <sup>c</sup> | (3' RACE)            |
| 256991                  | manganese peroxidase  | (5' RACE)                            | GGGATVACKCNGAGCAGTCG |
| 248589                  | mannanase             | ATGTTGAAAGTAGGCTTCCTCG               | TCAGCCACGAGCCTTGAGT  |
| 262694                  | xylanase              | ATGGTCAAGCTCTCCGCCTC                 | TCATGCGCTGAGAGCTGCAG |

<sup>a</sup>Protein IDs from the JGI genome portal (<http://www.jgi.doe.gov/Pcarnosa>).

<sup>b</sup>Where indicated, 5' or 3' RACE was performed using the SMART RACE cDNA Amplification Kit (Clontech Laboratories Inc., Mountain View, CA, USA).

<sup>c</sup>From Macarena,S.; Larrondo,L.F.; Vasquez,M.; Vicuna,R.; Gonzalez,B. 2005. Incomplete processing of peroxidase transcripts in the lignin degrading fungus *Phanerochaete chrysosporium*. FEMS Microbiol. Lett. 242:37-44.
