# Supplementary material
Source: PubMed Central journal article supplement (PMC3294475)
Supplement: supp_78.5.1596_AEM-AEM06511-11-s05.pdf [file supp_78.5.1596_AEM-AEM06511-11-s05.pdf]

Supplemental Table 3. Bonferroni's multiple comparison post-test of transcript abundance at each growth point (GP) following repeated measures ANOVA. p-values are indicated as follows: ns, >0.05; \*, 0.01 to 0.05; \*\*, 0.001 to 0.01; \*\*\*, <0.001. Arrows indicate whether the abundance of the transcript listed in the column heading is higher (↑) or lower (↓) than transcripts having significantly different abundances.

| GP 1       |            |            |            |            |            |            |            |           |            |
|------------|------------|------------|------------|------------|------------|------------|------------|-----------|------------|
|            | MnP-256991 | MnP-262882 | LiP-263501 | LiP-213241 | Man-248589 | Xyl-262694 | Axe-248451 | GE-247750 | Cbh-264060 |
|            | ↓          | ↓          | ↓          | ↓          | ↑          | ↓          | ↓          | ↓         | ↓          |
| MnP-256991 | -          | ns         | ns         | ns         | **         | ns         | ns         | ns        | ns         |
| MnP-262882 | ns         | -          | ns         | ns         | ***        | ns         | ns         | ns        | ns         |
| LiP-263501 | ns         | ns         | -          | ns         | ***        | ns         | ns         | ns        | ns         |
| LiP-213241 | ns         | ns         | ns         | -          | ***        | ns         | ns         | ns        | ns         |
| Man-248589 | **         | ***        | ***        | ***        | -          | ***        | *          | ***       | ns         |
| Xyl-262694 | ns         | ns         | ns         | ns         | ***        | -          | ns         | ns        | ns         |
| Axe-248451 | ns         | ns         | ns         | ns         | *          | ns         | -          | ns        | ns         |
| GE-247750  | ns         | ns         | ns         | ns         | ***        | ns         | ns         | -         | ns         |
| Cbh-264060 | ns         | ns        | -          |

| GP 2       |            |            |            |            |            |            |            |           |            |
|------------|------------|------------|------------|------------|------------|------------|------------|-----------|------------|
|            | MnP-256991 | MnP-262882 | LiP-263501 | LiP-213241 | Man-248589 | Xyl-262694 | Axe-248451 | GE-247750 | Cbh-264060 |
|            | ↑          | ↑          | ↓          | ↓          | ↑↓         | ↓          | ↓          | ↓         | ↓          |
| MnP-256991 | -          | ns         | ***        | ***        | *<br>(↓)   | ***        | ***        | ***       | ***        |
| MnP-262882 | ns         | -          | ***        | ***        | ns         | ns         | *          | ***       | ns         |

|            |     |     |    |    |           |    |    |    |    |
|------------|-----|-----|----|----|-----------|----|----|----|----|
| LiP-263501 | *** | *** | -  | ns | *<br>(↑)  | ns | ns | ns | ns |
| LiP-213241 | *** | *** | ns | -  | **<br>(↑) | ns | ns | ns | ns |
| Man-248589 | *   | ns  | *  | ** | -         | ns | ns | ** | ns |
| Xyl-262694 | *** | ns  | ns | ns | ns        | -  | ns | ns | ns |
| Axe-248451 | *** | *   | ns | ns | ns        | ns | -  | ns | ns |
| GE-247750  | *** | *** | ns | ns | **<br>(↑) | ns | ns | -  | ns |
| Cbh-264060 | *** | ns  | ns | ns | ns        | ns | ns | ns | -  |

| <b>GP 3</b> |            |            |            |            |            |            |            |           |            |
|-------------|------------|------------|------------|------------|------------|------------|------------|-----------|------------|
|             | MnP-256991 | MnP-262882 | LiP-263501 | LiP-213241 | Man-248589 | Xyl-262694 | Axe-248451 | GE-247750 | Cbh-264060 |
|             | ↑↓         | ↑↓         | ↓          | ↓          | ↑          | ↑↓         | ↓          | ↓         | ↑↓         |
| MnP-256991  | -          | ns         | ***        | ***        | ***        | ns         | ns         | **        | ns         |
| MnP-262882  | ns         | -          | **         | **         | ***        | ns         | ns         | *         | ns         |
| LiP-263501  | ***<br>(↑) | **<br>(↑)  | -          | ns         | ***        | ***<br>(↑) | ns         | ns        | ***<br>(↑) |
| LiP-213241  | ***<br>(↑) | **<br>(↑)  | ns         | -          | ***        | ***<br>(↑) | ns         | ns        | ***<br>(↑) |
| Man-248589  | ***<br>(↓) | ***<br>(↓) | ***        | ***        | -          | **<br>(↓)  | ***        | ***       | *<br>(↓)   |
| Xyl-262694  | ns         | ns         | ***        | ***        | **         | -          | ns         | ***       | ns         |
| Axe-248451  | ns         | ns         | ns         | ns         | ***        | ns         | -          | ns        | **<br>(↑)  |
| GE-247750   | **<br>(↑)  | *<br>(↑)   | ns         | ns         | ***        | ***<br>(↑) | ns         | -         | ***<br>(↑) |
| Cbh-264060  | ns         | ns         | ***        | ***        | *          | ns         | **         | ***       | -          |
